# Supplementary material for: Assessment of Prevalence, Associations ,Knowledge, and Practices about Diabetic Foot Disease in a Tertiary Care Hospital in Colombo, Sri Lanka
Source: Hindawi journal article supplement (doi:10.1155/2020/4504627), 2020-11-26
Supplement: f1 [file 4504627.f1.pdf]

# Appendix 1 – Questionnaires

Serial number:

**Q 1**

**CONFIDENTIAL**

**ANNEXURE 1 - Interviewer administered questionnaire: Sociodemographic data**

**Prevalence of diabetic foot, existing knowledge and practices on foot care among patients attending the diabetic clinic at Colombo South Teaching Hospital.**

- i. Age ----- yrs.
- ii. Sex: F / M
- iii. Address:
- iv. Duration of Type 2 Diabetes ----- yrs.
- v. Marital status

|                       |  |            |  |
|-----------------------|--|------------|--|
| 1. Single             |  | 2. Married |  |
| 3. Divorced/separated |  | 4. Widowed |  |
| 5. Other              |  |            |  |

- vi. Level of education

|                       |  |                     |  |
|-----------------------|--|---------------------|--|
| 1. Not gone to school |  | 2. Grade 1-5        |  |
| 3. Grade 6-10         |  | 4. Up to O/L        |  |
| 5. Up to A/L          |  | 6. Degree and above |  |

- vii. Occupation

|                                        |  |                                                   |  |
|----------------------------------------|--|---------------------------------------------------|--|
| 1. Manager                             |  | 2. Professional                                   |  |
| 3. Associate professionals/technicians |  | 4. Clerical support workers                       |  |
| 5. Service and sales worker            |  | 6. Skilled agricultural, forestry, fishery worker |  |
| 7. Craft & related trades worker       |  | 8. Plant & machine operators.                     |  |
| 9. Elementary occupation               |  | 10. Armed forces                                  |  |
| 11. Retired                            |  | 12. Housewife                                     |  |
| 13. Unemployed                         |  | 14. Other                                         |  |

- viii. Level of monthly income

|                       |  |                       |  |
|-----------------------|--|-----------------------|--|
| 1. Rs. <10,000        |  | 2. Rs. 10,000-20,000  |  |
| 3. Rs. 20,000- 30,000 |  | 4. Rs. 30,000- 40,000 |  |
| 5. Rs. >40,000        |  |                       |  |

**CONFIDENTIAL**

**ANNEXURE 2 – Medical history, Diabetes related complications and medication data sheet, to be filled by medical officers.**

**Prevalence of diabetic foot, existing knowledge and practices on foot care among patients attending the diabetic clinic at Colombo South Teaching Hospital.**

Height -----cm      weight -----Kg      BMI-----

Smoking:

Alcohol:

|                |  |            |
|----------------|--|------------|
| Current smoker |  | Pack years |
| Ex-smoker      |  |            |

|     |  |    |  |
|-----|--|----|--|
| Yes |  | No |  |
|-----|--|----|--|

Medical history

|                             |  |
|-----------------------------|--|
| Ischaemic heart disease     |  |
| Heart failure               |  |
| Hypertension                |  |
| Dyslipidemia                |  |
| PVD                         |  |
| CVA                         |  |
| CRF                         |  |
| Thyroid diseases            |  |
| Osteoarthritis              |  |
| Osteoporosis                |  |
| Bronchial asthma/ COPD      |  |
| Cancer                      |  |
| Connective tissue disorders |  |
| Other - specify             |  |
|                             |  |
|                             |  |

| Investigations          |         |      |
|-------------------------|---------|------|
|                         | Results | Date |
| <b>FBS</b>              |         |      |
| <b>PPBS</b>             |         |      |
| <b>RBS</b>              |         |      |
| <b>Hb<sub>A1C</sub></b> |         |      |
| <b>Lipid Profile:</b>   |         |      |
| Total Cholesterol       |         |      |
| TG                      |         |      |
| HDL                     |         |      |
| LDL                     |         |      |
| Chol/HDL                |         |      |
| <b>Hb</b>               |         |      |
|                         |         |      |
|                         |         |      |
|                         |         |      |

**Medication for diabetes**

|                         |  |
|-------------------------|--|
| Oral hypoglycemic drugs |  |
| Insulin                 |  |

**Compliant with medications**

|        |  |       |  |
|--------|--|-------|--|
| 1. Yes |  | 2. No |  |
|--------|--|-------|--|

## Complications of Diabetes

### Macrovascular complications

|                                    | Yes | No |
|------------------------------------|-----|----|
| Ischaemic heart diseases           |     |    |
| Stroke/ Transient ischaemic attack |     |    |
| PVD                                |     |    |

### Microvascular complications

#### Diabetic neuropathy in feet

|                              | R   |    | L   |    |
|------------------------------|-----|----|-----|----|
| Abnormal monofilament test   | Yes | No | Yes | No |
| Abnormal vibration sensation | Yes | No | Yes | No |

#### Diabetic retinopathy

|                               |  |
|-------------------------------|--|
| No diabetic retinopathy       |  |
| Maculopathy                   |  |
| Non proliferative retinopathy |  |
| Proliferative retinopathy     |  |

#### Diabetic nephropathy

|                                    |         |
|------------------------------------|---------|
| Presence of albumin in urine (UFR) | Yes/ No |
| Microalbumin/ creatinine ratio     |         |
| Serum Creatinine                   |         |
| eGFR                               |         |

## The Diabetic Foot Risk Assessment

|                                       |   |   |
|---------------------------------------|---|---|
| <input type="radio"/> <b>Low Risk</b> |   |   |
| <b>Skin/Nails</b>                     |   |   |
| <input type="radio"/> Dry             | R | L |
| <input type="radio"/> Sweaty          | R | L |
| <b>Vascular</b>                       |   |   |
| <input type="radio"/> Shiny skin      | R | L |
| <input type="radio"/> Hair Loss       | R | L |
| <input type="radio"/> Edema           | R | L |

|                                                  |       |   |
|--------------------------------------------------|-------|---|
| <input type="checkbox"/> <b>Moderate Risk</b>    |       |   |
| <b>Skin/Nails</b>                                |       |   |
| <input type="checkbox"/> Maceration              | R     | L |
| <input type="checkbox"/> Fissure/cracks          | R     | L |
| <input type="checkbox"/> Corn                    | R     | L |
| <input type="checkbox"/> Blister                 | R     | L |
| <input type="checkbox"/> Callus                  | R     | L |
| <input type="checkbox"/> ↑Temp.                  | R     | L |
| <input type="checkbox"/> Thickened nails         | R     | L |
| <input type="checkbox"/> Discolored nails        | R     | L |
| <input type="checkbox"/> Deformed nails          | R     | L |
| <input type="checkbox"/> Ingrown nails           | R     | L |
| <b>Structure</b>                                 |       |   |
| <input type="checkbox"/> Hammer toes / claw toes | R     | L |
| <input type="checkbox"/> Overlapping digits      | R     | L |
| <input type="checkbox"/> Bunion                  | R     | L |
| <input type="checkbox"/> Arch deformity          | R     | L |
| <b>Sensation</b>                                 |       |   |
| <input type="checkbox"/> Diminished              | R     | L |
| <input type="checkbox"/> Absent                  | R     | L |
| <input type="checkbox"/> Painful neuropathy      | R     | L |
| <b>Mobility</b>                                  |       |   |
| <input type="checkbox"/> ↓ ROM                   |       |   |
|                                                  | Toes  |   |
|                                                  | Ankle |   |
|                                                  | R     | L |
|                                                  | R     | L |
| <b>Vascular</b>                                  |       |   |
| <input type="checkbox"/> Edema (weeping)         | R     | L |
| <input type="checkbox"/> Cold skin               | R     | L |
| <input type="checkbox"/> Pallor/cyanosis         | R     | L |
| <input type="checkbox"/> Cap. refill > 3-4 sec   | R     | L |
| <input type="checkbox"/> Absent dorsalis pedis   | R     | L |
| <input type="checkbox"/> Absent posterior tibial | R     | L |
| ABPI                                             | R     | L |

|                                                         |     |    |
|---------------------------------------------------------|-----|----|
| <input checked="" type="radio"/> <b>High Risk</b>       |     |    |
| <b>Skin/Nails</b>                                       |     |    |
| <input checked="" type="radio"/> Skin breakdown         | R   | L  |
| <input checked="" type="radio"/> Ever had a foot ulcer? | Yes | No |
| Present foot ulcer                                      | R   | L  |
| Ulcer within past 1 year                                | R   | L  |
| <b>Structure</b>                                        |     |    |
| <input checked="" type="radio"/> Amputation             |     |    |
| Toe amputations                                         | R   | L  |
| Mid tarsal amputations                                  | R   | L  |
| Below knee amputations                                  | R   | L  |
| Above knee amputations                                  | R   | L  |

### FOOT CARE/FOOTWEAR

- Poor foot hygiene (*includes long or poorly shaped nails*)
- Needs assistance with foot care (*poor vision, ↓ mobility*)
- Inappropriate footwear (*poor style, condition, or fit*)
- No problem noted.

### FOOT CARE EDUCATION

- Foot Care Questionnaire Completed
- Foot Care Education
- Foot Care Review
- Foot Risk Information Sheet Provided

|                                                    |  |
|----------------------------------------------------|--|
| <b>Risk Category</b>                               |  |
| <input type="radio"/> <b>Low (Green)</b>           |  |
| <input type="checkbox"/> <b>Moderate (Yellow)</b>  |  |
| <input checked="" type="radio"/> <b>High (Red)</b> |  |

**Diabetic foot**

|                                                                    |     |    |
|--------------------------------------------------------------------|-----|----|
| 1. Current or past foot ulcer which took more than 2 weeks to heal | Yes | No |
| 2. Peripheral vascular disease                                     | Yes | No |
| 3. Peripheral neuropathy                                           | Yes | No |

Presence of all above 3 factors is indicative of presence of diabetic foot.

|               |        |  |         |  |
|---------------|--------|--|---------|--|
| Diabetic foot | Absent |  | Present |  |
|---------------|--------|--|---------|--|

**CONFIDENTIAL****ANNEXURE 3 - Self-administered questionnaire: Diabetic foot care****Prevalence of diabetic foot, existing knowledge and practices on foot care among patients attending the diabetic clinic at Colombo South Teaching Hospital.****History of Foot Problems**

- Have you ever had a sore or cut on your foot or leg that took
- more than two weeks to heal?  Yes  No
- Have you ever had a foot ulcer?  Yes  No
- Have you ever had an amputation of a toe, foot, or leg?  Yes  No
- (If yes, date: \_\_\_\_/\_\_\_\_/\_\_\_\_).

**Current Foot or Leg Problems**

- Do you have an ulcer, sore, or blister on your feet at this time?  Yes  No
- Do you have blood or discharge on your socks?  Yes  No
- Do you have any calluses on your feet?  Yes  No
- Do you have any numbness, tingling, pins and needles, or itching sensation in your feet?  Yes  No

**Foot Care**

- Can you reach and **see** the bottoms of your feet?  Yes  No
- Do you examine your feet? (If yes, how often?)  Yes  No
- Every day  2-6 times a week
- Once a week or less  When I have a problem
- Do you wash your feet everyday?  Yes  No

- Do you dry well between the toes?  Yes  No
- Do you use a moisturizing cream on your feet?  Yes  No
- Do you cut your own toenails? (If no, who does this for you?)  Yes  No

Family member  Caregiver  Foot care nurse/ Podiatrist

## Foot Wear

What kind of shoes do you wear? (Check all that apply.)

- pointed toes
- broad, round toes
- high heels
- sandals
- flip flops
- athletic/sneakers/runners
- shoes made of leather or canvas
- special/custom shoes
- shoes with adjustable laces, buckles or velcro

## Safety and Prevention

- Do you ever soak your feet?  
 Yes  No
- Do you always test water temperature before putting your foot in?  
 Yes  No
- Do you use medicated products for warts, corns or calluses?  
 Yes  No
- Do you put moisturizing creams or lotions between your toes?  
 Yes  No
- Do you ever walk around in your bare feet?  
 Yes  No
- Do you ever wear shoes without wearing any socks?  
 Yes  No
- Do you always inspect your shoes for foreign objects or torn linings?  
 Yes  No
- Do you use a hot water bottle or heating pad on your feet?  
 Yes  No
- Do you sit with your legs crossed?  
 Yes  No
- Do you smoke?  
 Yes  No



## Foot Care Education

- |                                                                                       |                              |                             |
|---------------------------------------------------------------------------------------|------------------------------|-----------------------------|
| <input type="checkbox"/> Have you ever attended a class on how to care for your feet? | <input type="checkbox"/> Yes | <input type="checkbox"/> No |
| <input type="checkbox"/> Have you ever read any handouts on <u>foot care</u> ?        | <input type="checkbox"/> Yes | <input type="checkbox"/> No |
| <input type="checkbox"/> Have you ever read any handouts on proper <u>footwear</u> ?  | <input type="checkbox"/> Yes | <input type="checkbox"/> No |
| <input type="checkbox"/> Would you like a handout on how to care for your feet?       | <input type="checkbox"/> Yes | <input type="checkbox"/> No |

**Thank you!**

---



Appendix 2 – consent form

**Consent Form**

**Prevalence of diabetic foot, existing knowledge and practices on foot care among patients attending the diabetic clinic at Colombo South Teaching Hospital.**

**To be completed by the participant.**

1. Have you read the information sheet? **Yes/No**
2. Have you received enough information about the study? **Yes/No**
3. Have had an opportunity to discuss this study and ask any questions? **Yes/No**
4. Have you had satisfactory answers to all your questions? **Yes/No**
5. Who explained the study to you? .....
6. Do you understand that you are free to withdraw from the study at any time without having to giving reason and without affecting your future medical care? **Yes/No**
7. Sections of your medical notes and investigation reports will be checked by medical officers/ research assistants. All personal details will be considered as strictly confidential. Do you give permission to access your medical records? **Yes/No**
8. Have you had sufficient time to come to your decision? **Yes/No**
9. Do you agree to take part in this study? **Yes/No**

Name of the participant: \_\_\_\_\_

Signature: \_\_\_\_\_

Date: \_\_\_\_\_

**To be completed by the investigator.**

I have explained the study to the above participant and he/she has indicated her willingness to take part in this study.

Name of the investigator: \_\_\_\_\_

Signature: \_\_\_\_\_

Date: \_\_\_\_\_
